# Supplementary material for: Project OPUS: Development and evaluation of an electronic platform for pain management education of medical undergraduates in resource-limited settings
Source: PubMed Central journal article supplement (PMC7728241; doi:10.1371/journal.pone.0243573), 2020-12-10
Supplement: pone.0243573.s001.pdf [file pone.0243573.s001.pdf]

| University site | ParticipantID | sex | pretest | posttest | universitymeanpretest | universitymeanposttest | Pretest | Mod1 | Mod2 | Mod3 | Mod4 | Mod5 | Mod6 | Posttest |
|-----------------|---------------|-----|---------|----------|-----------------------|------------------------|---------|------|------|------|------|------|------|----------|
| 1               | 1             | 0   | 0.40    | 0.65     | 0.37                  | 0.59                   | 0.40    | 0.80 | 1.00 | 0.80 | 0.80 | 0.80 | 1.00 | 0.65     |
| 1               | 2             | 0   | 0.35    | 0.50     | 0.37                  | 0.59                   | 0.35    | 0.80 | 0.60 | 0.20 | 0.80 | 0.80 | 0.80 | 0.50     |
| 1               | 3             | 0   | 0.40    | 0.60     | 0.37                  | 0.59                   | 0.40    | 0.80 | 0.80 | 0.60 | 0.80 | 0.60 | 0.80 | 0.60     |
| 1               | 4             | 0   | 0.50    | 0.65     | 0.37                  | 0.59                   | 0.50    | 0.80 | 1.00 | 0.80 | 0.80 | 0.80 | 0.80 | 0.65     |
| 1               | 5             | 1   | 0.20    | 0.70     | 0.37                  | 0.59                   | 0.20    | 0.80 | 0.80 | 0.60 | 0.80 | 1.00 | 0.80 | 0.70     |
| 1               | 6             | 0   | 0.40    | 0.70     | 0.37                  | 0.59                   | 0.40    | 0.80 | 0.60 | 1.00 | 0.60 | 0.80 | 1.00 | 0.70     |
| 1               | 7             | 0   | 0.35    | 0.60     | 0.37                  | 0.59                   | 0.35    | 0.80 | 0.80 | 0.80 | 0.80 | 0.60 | 0.80 | 0.60     |
| 1               | 8             | 1   | 0.35    | 0.50     | 0.37                  | 0.59                   | 0.35    | 0.80 | 1.00 | 0.80 | 0.80 | 1.00 | 0.80 | 0.50     |
| 1               | 9             | 1   | 0.30    | 0.55     | 0.37                  | 0.59                   | 0.30    | 0.60 | 0.80 | 1.00 | 0.60 | 0.60 | 0.80 | 0.55     |
| 1               | 10            | 0   | 0.40    | 0.70     | 0.37                  | 0.59                   | 0.40    | 0.80 | 0.60 | 0.60 | 0.80 | 0.60 | 0.60 | 0.70     |
| 1               | 11            | 1   | 0.50    | 0.55     | 0.37                  | 0.59                   | 0.50    | 0.80 | 1.00 | 0.60 | 0.60 | 1.00 | 1.00 | 0.55     |
| 1               | 12            | 1   | 0.40    | 0.60     | 0.37                  | 0.59                   | 0.40    | 0.60 | 1.00 | 0.80 | 0.80 | 0.80 | 1.00 | 0.60     |
| 1               | 13            | 1   | 0.45    | 0.50     | 0.37                  | 0.59                   | 0.45    | 0.80 | 1.00 | 1.00 | 0.80 | 0.60 | 1.00 | 0.50     |
| 1               | 14            | 0   | 0.30    | 0.75     | 0.37                  | 0.59                   | 0.30    | 0.80 | 0.80 | 0.80 | 0.60 | 1.00 | 0.80 | 0.75     |
| 1               | 15            | 1   | 0.25    | 0.50     | 0.37                  | 0.59                   | 0.25    | 0.60 | 1.00 | 0.60 | 0.80 | 0.80 | 1.00 | 0.50     |
| 1               | 16            | 0   | 0.50    | 0.50     | 0.37                  | 0.59                   | 0.50    | 0.60 | 1.00 | 1.00 | 0.80 | 0.60 | 1.00 | 0.50     |
| 1               | 17            | 1   | 0.30    | 0.60     | 0.37                  | 0.59                   | 0.30    | 0.80 | 0.60 | 0.60 | 0.80 | 1.00 | 1.00 | 0.60     |
| 1               | 18            | 0   | 0.20    | 0.60     | 0.37                  | 0.59                   | 0.20    | 0.60 | 0.80 | 0.80 | 0.80 | 0.80 | 0.80 | 0.60     |
| 1               | 19            | 0   | 0.35    | 0.50     | 0.37                  | 0.59                   | 0.35    | 0.60 | 0.60 | 0.80 | 0.80 | 0.60 | 1.00 | 0.50     |
| 1               | 20            | 0   | 0.45    | 0.55     | 0.37                  | 0.59                   | 0.45    | 0.80 | 1.00 | 0.80 | 0.80 | 0.80 | 0.80 | 0.55     |
| 2               | 1             | 0   | 0.30    | 0.65     | 0.42                  | 0.59                   | 0.30    | 0.80 | 0.80 | 0.80 | 0.60 | 0.80 | 0.80 | 0.65     |
| 2               | 2             | 0   | 0.45    | 0.50     | 0.42                  | 0.59                   | 0.45    | 0.80 | 1.00 | 1.00 | 0.80 | 0.80 | 1.00 | 0.50     |
| 2               | 3             | 0   | 0.45    | 0.75     | 0.42                  | 0.59                   | 0.45    | 0.60 | 1.00 | 1.00 | 0.80 | 1.00 | 0.80 | 0.75     |
| 2               | 4             | 1   | 0.45    | 0.50     | 0.42                  | 0.59                   | 0.45    | 0.80 | 0.80 | 0.80 | 0.60 | 0.60 | 0.80 | 0.50     |
| 2               | 5             | 1   | 0.45    | 0.50     | 0.42                  | 0.59                   | 0.45    | 0.80 | 0.80 | 1.00 | 0.80 | 1.00 | 1.00 | 0.50     |
| 2               | 6             | 0   | 0.55    | 0.55     | 0.42                  | 0.59                   | 0.55    | 0.60 | 1.00 | 1.00 | 0.80 | 0.60 | 1.00 | 0.55     |
| 2               | 7             | 1   | 0.30    | 0.75     | 0.42                  | 0.59                   | 0.30    | 0.80 | 1.00 | 1.00 | 0.80 | 0.80 | 0.60 | 0.75     |
| 2               | 8             | 0   | 0.25    | 0.35     | 0.42                  | 0.59                   | 0.25    | 0.60 | 0.60 | 0.80 | 0.80 | 0.80 | 1.00 | 0.35     |
| 2               | 9             | 1   | 0.40    | 0.65     | 0.42                  | 0.59                   | 0.40    | 0.80 | 0.60 | 0.80 | 0.60 | 0.80 | 0.60 | 0.65     |
| 2               | 10            | 1   | 0.30    | 0.60     | 0.42                  | 0.59                   | 0.30    | 0.60 | 0.80 | 1.00 | 0.80 | 0.80 | 1.00 | 0.60     |
| 2               | 11            | 1   | 0.35    | 0.60     | 0.42                  | 0.59                   | 0.35    | 0.60 | 0.80 | 0.80 | 0.60 | 0.80 | 0.50 | 0.60     |
| 2               | 12            | 0   | 0.30    | 0.70     | 0.42                  | 0.59                   | 0.30    | 1.00 | 0.80 | 0.80 | 0.80 | 0.80 | 0.80 | 0.70     |
| 2               | 13            | 1   | 0.55    | 0.65     | 0.42                  | 0.59                   | 0.55    | 0.80 | 0.80 | 0.80 | 0.80 | 0.80 | 0.80 | 0.65     |
| 2               | 14            | 0   | 0.50    | 0.75     | 0.42                  | 0.59                   | 0.50    | 0.80 | 1.00 | 1.00 | 0.80 | 1.00 | 0.80 | 0.75     |
| 2               | 15            | 0   | 0.60    | 0.35     | 0.42                  | 0.59                   | 0.60    | 0.80 | 0.80 | 0.80 | 0.80 | 0.80 | 1.00 | 0.35     |
| 2               | 16            | 1   | 0.65    | 0.60     | 0.42                  | 0.59                   | 0.65    | 0.80 | 1.00 | 0.80 | 0.80 | 0.80 | 1.00 | 0.60     |
| 2               | 17            | 1   | 0.35    | 0.55     | 0.42                  | 0.59                   | 0.35    | 0.60 | 1.00 | 1.00 | 0.80 | 0.80 | 1.00 | 0.55     |
| 2               | 18            | 1   | 0.50    | 0.85     | 0.42                  | 0.59                   | 0.50    | 0.80 | 0.80 | 1.00 | 0.80 | 0.80 | 0.80 | 0.85     |
| 2               | 19            | 0   | 0.50    | 0.60     | 0.42                  | 0.59                   | 0.50    | 0.80 | 1.00 | 0.80 | 0.80 | 0.80 | 1.00 | 0.60     |
| 2               | 20            | 0   | 0.50    | 0.60     | 0.42                  | 0.59                   | 0.50    | 0.80 | 1.00 | 1.00 | 0.80 | 0.80 | 0.80 | 0.60     |
| 2               | 21            | 0   | 0.30    | 0.75     | 0.42                  | 0.59                   | 0.30    | 0.60 | 1.00 | 1.00 | 0.80 | 0.80 | 1.00 | 0.75     |
| 2               | 22            | 0   | 0.45    | 0.35     | 0.42                  | 0.59                   | 0.45    | 0.80 | 1.00 | 0.80 | 0.80 | 0.80 | 1.00 | 0.35     |
| 2               | 23            | 0   | 0.30    | 0.55     | 0.42                  | 0.59                   | 0.30    | 0.80 | 0.80 | 0.80 | 1.00 | 0.80 | 0.80 | 0.55     |
| 2               | 24            | 0   | 0.45    | 0.75     | 0.42                  | 0.59                   | 0.45    | 0.80 | 0.80 | 0.80 | 0.80 | 0.80 | 1.00 | 0.75     |
| 2               | 25            | 1   | 0.60    | 0.80     | 0.42                  | 0.59                   | 0.60    | 0.80 | 1.00 | 1.00 | 0.80 | 0.80 | 0.80 | 0.80     |
| 2               | 26            | 0   | 0.40    | 0.55     | 0.42                  | 0.59                   | 0.40    | 0.60 | 0.80 | 1.00 | 0.80 | 0.80 | 0.80 | 0.55     |
| 2               | 27            | 1   | 0.60    | 0.70     | 0.42                  | 0.59                   | 0.60    | 0.60 | 0.60 | 0.80 | 0.60 | 0.80 | 1.00 | 0.70     |

|   |    |   |      |      |      |      |      |      |      |      |      |      |      |      |
|---|----|---|------|------|------|------|------|------|------|------|------|------|------|------|
| 2 | 28 | 1 | 0.50 | 0.50 | 0.42 | 0.59 | 0.50 | 0.80 | 0.80 | 0.60 | 0.80 | 0.80 | 0.80 | 0.50 |
| 2 | 29 | 0 | 0.55 | 0.70 | 0.42 | 0.59 | 0.55 | 1.00 | 1.00 | 0.80 | 0.80 | 1.00 | 0.80 | 0.70 |
| 2 | 30 | 1 | 0.40 | 0.30 | 0.42 | 0.59 | 0.40 | 0.80 | 0.80 | 0.80 | 0.80 | 0.80 | 0.80 | 0.30 |
| 2 | 31 | 0 | 0.40 | 0.55 | 0.42 | 0.59 | 0.40 | 0.60 | 1.00 | 1.00 | 0.80 | 0.80 | 1.00 | 0.55 |
| 2 | 32 | 1 | 0.55 | 0.65 | 0.42 | 0.59 | 0.55 | 0.80 | 1.00 | 1.00 | 0.80 | 0.80 | 1.00 | 0.65 |
| 2 | 33 | 1 | 0.45 | 0.60 | 0.42 | 0.59 | 0.45 | 0.60 | 0.80 | 0.80 | 0.60 | 0.80 | 1.00 | 0.60 |
| 2 | 34 | 1 | 0.45 | 0.90 | 0.42 | 0.59 | 0.45 | 0.60 | 0.80 | 0.80 | 0.80 | 0.80 | 1.00 | 0.90 |
| 2 | 35 | 1 | 0.25 | 0.75 | 0.42 | 0.59 | 0.25 | 0.80 | 0.80 | 0.60 | 1.00 | 1.00 | 0.80 | 0.75 |
| 2 | 36 | 1 | 0.25 | 0.55 | 0.42 | 0.59 | 0.25 | 0.75 | 0.80 | 1.00 | 0.60 | 0.80 | 1.00 | 0.55 |
| 2 | 37 | 1 | 0.60 | 0.50 | 0.42 | 0.59 | 0.60 | 0.80 | 1.00 | 1.00 | 0.80 | 0.80 | 1.00 | 0.50 |
| 2 | 38 | 1 | 0.30 | 0.80 | 0.42 | 0.59 | 0.30 | 0.80 | 0.80 | 0.80 | 0.80 | 1.00 | 1.00 | 0.80 |
| 2 | 39 | 0 | 0.40 | 0.55 | 0.42 | 0.59 | 0.40 | 0.80 | 1.00 | 0.80 | 0.80 | 0.80 | 0.80 | 0.55 |
| 2 | 40 | 0 | 0.40 | 0.40 | 0.42 | 0.59 | 0.40 | 0.40 | 0.80 | 0.80 | 0.80 | 0.80 | 0.80 | 0.40 |
| 2 | 41 | 0 | 0.35 | 0.65 | 0.42 | 0.59 | 0.35 | 0.80 | 1.00 | 0.60 | 0.80 | 1.00 | 1.00 | 0.65 |
| 2 | 42 | 0 | 0.60 | 0.50 | 0.42 | 0.59 | 0.60 | 0.80 | 1.00 | 0.80 | 0.80 | 0.80 | 1.00 | 0.50 |
| 2 | 43 | 0 | 0.30 | 0.55 | 0.42 | 0.59 | 0.30 | 0.80 | 1.00 | 0.80 | 0.80 | 1.00 | 1.00 | 0.55 |
| 2 | 44 | 1 | 0.40 | 0.75 | 0.42 | 0.59 | 0.40 | 0.80 | 1.00 | 1.00 | 0.80 | 0.80 | 0.80 | 0.75 |
| 2 | 45 | 1 | 0.30 | 0.60 | 0.42 | 0.59 | 0.30 | 0.80 | 0.80 | 0.80 | 0.80 | 0.60 | 0.80 | 0.60 |
| 2 | 46 | 1 | 0.60 | 0.30 | 0.42 | 0.59 | 0.60 | 0.60 | 0.60 | 0.60 | 0.80 | 0.80 | 0.80 | 0.30 |
| 2 | 47 | 0 | 0.35 | 0.45 | 0.42 | 0.59 | 0.35 | 0.60 | 0.80 | 0.80 | 0.60 | 0.80 | 1.00 | 0.45 |
| 2 | 48 | 1 | 0.50 | 0.60 | 0.42 | 0.59 | 0.50 | 0.80 | 0.80 | 1.00 | 0.80 | 1.00 | 0.80 | 0.60 |
| 2 | 49 | 1 | 0.45 | 0.75 | 0.42 | 0.59 | 0.45 | 0.80 | 0.80 | 1.00 | 0.80 | 1.00 | 1.00 | 0.75 |
| 2 | 50 | 0 | 0.35 | 0.65 | 0.42 | 0.59 | 0.35 | 0.80 | 1.00 | 1.00 | 0.80 | 0.80 | 0.60 | 0.65 |
| 2 | 51 | 1 | 0.30 | 0.55 | 0.42 | 0.59 | 0.30 | 0.80 | 0.60 | 1.00 | 0.60 | 0.80 | 1.00 | 0.55 |
| 2 | 52 | 0 | 0.45 | 0.45 | 0.42 | 0.59 | 0.45 | 0.45 | 0.80 | 0.80 | 1.00 | 0.80 | 0.60 | 0.45 |
| 2 | 53 | 0 | 0.55 | 0.60 | 0.42 | 0.59 | 0.55 | 0.80 | 1.00 | 1.00 | 0.80 | 0.60 | 1.00 | 0.60 |
| 2 | 54 | 1 | 0.60 | 0.60 | 0.42 | 0.59 | 0.60 | 0.80 | 1.00 | 0.80 | 0.80 | 1.00 | 1.00 | 0.60 |
| 2 | 55 | 1 | 0.30 | 0.60 | 0.42 | 0.59 | 0.30 | 0.80 | 0.80 | 0.80 | 0.80 | 0.80 | 0.80 | 0.60 |
| 2 | 56 | 1 | 0.60 | 0.65 | 0.42 | 0.59 | 0.60 | 0.80 | 1.00 | 0.80 | 0.80 | 0.80 | 1.00 | 0.65 |
| 2 | 57 | 1 | 0.40 | 0.75 | 0.42 | 0.59 | 0.40 | 0.80 | 0.60 | 0.80 | 0.80 | 1.00 | 0.80 | 0.75 |
| 2 | 58 | 0 | 0.45 | 0.65 | 0.42 | 0.59 | 0.45 | 0.60 | 0.60 | 0.80 | 0.60 | 0.80 | 0.80 | 0.65 |
| 2 | 59 | 1 | 0.50 | 0.35 | 0.42 | 0.59 | 0.50 | 0.80 | 0.80 | 0.80 | 0.80 | 0.80 | 0.80 | 0.35 |
| 2 | 60 | 0 | 0.35 | 0.45 | 0.42 | 0.59 | 0.35 | 0.80 | 1.00 | 0.80 | 0.80 | 0.80 | 0.80 | 0.45 |
| 2 | 61 | 1 | 0.35 | 0.45 | 0.42 | 0.59 | 0.35 | 0.80 | 0.80 | 0.80 | 0.80 | 0.80 | 0.40 | 0.45 |
| 2 | 62 | 1 | 0.40 | 0.60 | 0.42 | 0.59 | 0.40 | 0.80 | 0.80 | 0.80 | 0.80 | 0.80 | 0.80 | 0.60 |
| 2 | 63 | 0 | 0.50 | 0.45 | 0.42 | 0.59 | 0.50 | 0.80 | 1.00 | 1.00 | 1.00 | 1.00 | 1.00 | 0.45 |
| 2 | 64 | 1 | 0.50 | 0.60 | 0.42 | 0.59 | 0.50 | 0.80 | 1.00 | 1.00 | 0.80 | 1.00 | 1.00 | 0.60 |
| 2 | 65 | 1 | 0.40 | 0.55 | 0.42 | 0.59 | 0.40 | 0.40 | 1.00 | 1.00 | 1.00 | 0.60 | 0.80 | 0.55 |
| 2 | 66 | 1 | 0.60 | 0.60 | 0.42 | 0.59 | 0.60 | 0.60 | 1.00 | 1.00 | 0.60 | 0.80 | 0.60 | 0.60 |
| 2 | 67 | 0 | 0.35 | 0.70 | 0.42 | 0.59 | 0.35 | 0.80 | 0.80 | 0.60 | 0.80 | 0.60 | 1.00 | 0.70 |
| 2 | 68 | 0 | 0.30 | 0.45 | 0.42 | 0.59 | 0.30 | 0.80 | 1.00 | 1.00 | 0.80 | 0.80 | 0.80 | 0.45 |
| 2 | 69 | 1 | 0.50 | 0.80 | 0.42 | 0.59 | 0.50 | 0.80 | 0.80 | 1.00 | 0.80 | 1.00 | 1.00 | 0.80 |
| 2 | 70 | 0 | 0.30 | 0.50 | 0.42 | 0.59 | 0.30 | 0.80 | 0.60 | 0.60 | 0.80 | 0.80 | 1.00 | 0.50 |
| 2 | 71 | 0 | 0.30 | 0.55 | 0.42 | 0.59 | 0.30 | 0.80 | 1.00 | 0.80 | 0.80 | 0.60 | 1.00 | 0.55 |
| 2 | 72 | 1 | 0.35 | 0.45 | 0.42 | 0.59 | 0.35 | 0.80 | 1.00 | 0.80 | 0.80 | 0.80 | 1.00 | 0.45 |
| 2 | 73 | 1 | 0.40 | 0.45 | 0.42 | 0.59 | 0.40 | 0.80 | 1.00 | 0.80 | 0.80 | 0.80 | 1.00 | 0.45 |
| 2 | 74 | 0 | 0.55 | 0.60 | 0.42 | 0.59 | 0.55 | 0.60 | 0.60 | 0.60 | 0.80 | 0.60 | 0.60 | 0.60 |
| 2 | 75 | 0 | 0.50 | 0.50 | 0.42 | 0.59 | 0.50 | 0.80 | 0.80 | 1.00 | 0.80 | 1.00 | 1.00 | 0.50 |



|   |    |   |      |      |      |      |      |      |      |      |      |      |      |      |
|---|----|---|------|------|------|------|------|------|------|------|------|------|------|------|
| 4 | 21 | 0 | 0.30 | 0.95 | 0.41 | 0.69 | 0.30 | 0.60 | 1.00 | 1.00 | 0.80 | 1.00 | 1.00 | 0.95 |
| 4 | 22 | 0 | 0.40 | 0.55 | 0.41 | 0.69 | 0.40 | 0.60 | 0.60 | 0.60 | 0.60 | 0.60 | 0.60 | 0.55 |
| 4 | 23 | 1 | 0.30 | 0.65 | 0.41 | 0.69 | 0.30 | 0.80 | 0.60 | 0.60 | 0.80 | 1.00 | 0.80 | 0.65 |
| 4 | 24 | 1 | 0.30 | 0.95 | 0.41 | 0.69 | 0.30 | 1.00 | 0.20 | 1.00 | 0.80 | 1.00 | 1.00 | 0.95 |
| 4 | 25 | 1 | 0.30 | 0.95 | 0.41 | 0.69 | 0.30 | 0.80 | 1.00 | 1.00 | 0.80 | 1.00 | 1.00 | 0.95 |
| 4 | 26 | 0 | 0.30 | 0.75 | 0.41 | 0.69 | 0.30 | 0.80 | 0.80 | 0.60 | 0.80 | 0.60 | 1.00 | 0.75 |
| 4 | 27 | 1 | 0.25 | 0.90 | 0.41 | 0.69 | 0.25 | 0.60 | 0.60 | 0.60 | 0.80 | 0.80 | 1.00 | 0.90 |
| 4 | 28 | 1 | 0.35 | 0.60 | 0.41 | 0.69 | 0.35 | 0.80 | 0.60 | 0.60 | 0.60 | 0.60 | 0.60 | 0.60 |
| 4 | 29 | 0 | 0.45 | 0.55 | 0.41 | 0.69 | 0.45 | 0.60 | 0.80 | 0.80 | 0.80 | 0.80 | 1.00 | 0.55 |
| 4 | 30 | 1 | 0.45 | 0.30 | 0.41 | 0.69 | 0.45 | 0.80 | 0.80 | 0.80 | 0.80 | 0.80 | 0.80 | 0.30 |
| 4 | 31 | 1 | 0.40 | 0.65 | 0.41 | 0.69 | 0.40 | 0.80 | 1.00 | 1.00 | 0.80 | 1.00 | 1.00 | 0.65 |
| 4 | 32 | 1 | 0.60 | 0.70 | 0.41 | 0.69 | 0.60 | 0.60 | 1.00 | 1.00 | 0.80 | 1.00 | 1.00 | 0.70 |
| 4 | 33 | 1 | 0.20 | 0.50 | 0.41 | 0.69 | 0.20 | 0.60 | 0.80 | 0.80 | 0.80 | 0.80 | 1.00 | 0.50 |
| 4 | 34 | 1 | 0.35 | 0.95 | 0.41 | 0.69 | 0.35 | 1.00 | 1.00 | 1.00 | 0.80 | 1.00 | 0.80 | 0.95 |
| 4 | 35 | 1 | 0.25 | 1.00 | 0.41 | 0.69 | 0.25 | 0.80 | 1.00 | 1.00 | 0.80 | 1.00 | 1.00 | 1.00 |
| 4 | 36 | 0 | 0.75 | 0.95 | 0.41 | 0.69 | 0.75 | 0.80 | 1.00 | 1.00 | 0.80 | 1.00 | 1.00 | 0.95 |
| 4 | 37 | 1 | 0.45 | 0.25 | 0.41 | 0.69 | 0.45 | 0.80 | 1.00 | 1.00 | 0.80 | 0.60 | 1.00 | 0.25 |
| 4 | 38 | 0 | 1.00 | 0.95 | 0.41 | 0.69 | 1.00 | 0.80 | 1.00 | 1.00 | 0.80 | 1.00 | 1.00 | 0.95 |
| 4 | 39 | 1 | 0.35 | 0.80 | 0.41 | 0.69 | 0.35 | 0.60 | 0.60 | 0.60 | 0.60 | 1.00 | 1.00 | 0.80 |
| 4 | 40 | 1 | 0.35 | 0.60 | 0.41 | 0.69 | 0.35 | 0.60 | 0.60 | 1.00 | 0.60 | 0.80 | 0.60 | 0.60 |
| 4 | 41 | 0 | 0.35 | 0.75 | 0.41 | 0.69 | 0.35 | 0.60 | 1.00 | 1.00 | 0.80 | 1.00 | 0.80 | 0.75 |
| 4 | 42 | 0 | 0.30 | 0.60 | 0.41 | 0.69 | 0.30 | 0.80 | 1.00 | 1.00 | 0.60 | 0.60 | 0.80 | 0.60 |
| 4 | 43 | 1 | 0.45 | 0.95 | 0.41 | 0.69 | 0.45 | 0.60 | 0.80 | 0.80 | 0.80 | 1.00 | 0.80 | 0.95 |
| 4 | 44 | 1 | 0.30 | 0.25 | 0.41 | 0.69 | 0.30 | 0.80 | 1.00 | 0.80 | 0.80 | 0.60 | 1.00 | 0.25 |
| 4 | 45 | 0 | 0.35 | 0.55 | 0.41 | 0.69 | 0.35 | 0.80 | 0.80 | 0.80 | 0.80 | 0.60 | 1.00 | 0.55 |
| 4 | 46 | 1 | 0.40 | 0.40 | 0.41 | 0.69 | 0.40 | 0.80 | 0.40 | 0.40 | 0.80 | 0.40 | 0.20 | 0.40 |
| 4 | 47 | 1 | 0.25 | 0.60 | 0.41 | 0.69 | 0.25 | 0.60 | 0.60 | 0.80 | 0.80 | 0.80 | 0.80 | 0.60 |
| 4 | 48 | 1 | 0.40 | 0.50 | 0.41 | 0.69 | 0.40 | 0.80 | 0.80 | 1.00 | 0.80 | 1.00 | 1.00 | 0.50 |
| 4 | 49 | 1 | 0.30 | 1.00 | 0.41 | 0.69 | 0.30 | 0.80 | 1.00 | 1.00 | 1.00 | 1.00 | 1.00 | 1.00 |
| 4 | 50 | 1 | 0.25 | 0.55 | 0.41 | 0.69 | 0.25 | 0.60 | 0.60 | 0.80 | 0.80 | 0.80 | 0.80 | 0.55 |
| 4 | 51 | 0 | 0.45 | 0.55 | 0.41 | 0.69 | 0.45 | 0.80 | 1.00 | 1.00 | 0.80 | 0.80 | 1.00 | 0.55 |
| 4 | 52 | 1 | 0.65 | 0.65 | 0.41 | 0.69 | 0.65 | 0.80 | 1.00 | 0.80 | 0.80 | 0.80 | 1.00 | 0.65 |
| 4 | 53 | 1 | 0.30 | 0.95 | 0.41 | 0.69 | 0.30 | 0.80 | 1.00 | 1.00 | 0.80 | 1.00 | 1.00 | 0.95 |
| 4 | 54 | 1 | 0.45 | 0.40 | 0.41 | 0.69 | 0.45 | 0.80 | 0.80 | 1.00 | 0.80 | 0.80 | 1.00 | 0.40 |
| 4 | 55 | 1 | 0.45 | 0.85 | 0.41 | 0.69 | 0.45 | 0.40 | 0.60 | 0.60 | 0.80 | 0.80 | 0.40 | 0.85 |
| 4 | 56 | 0 | 0.60 | 0.50 | 0.41 | 0.69 | 0.60 | 0.80 | 0.60 | 0.60 | 0.60 | 0.60 | 0.60 | 0.50 |
| 4 | 57 | 0 | 0.40 | 0.50 | 0.41 | 0.69 | 0.40 | 0.60 | 0.60 | 0.60 | 0.80 | 1.00 | 1.00 | 0.50 |
| 4 | 58 | 0 | 1.00 | 0.95 | 0.41 | 0.69 | 1.00 | 0.80 | 1.00 | 1.00 | 0.80 | 1.00 | 0.60 | 0.95 |
| 4 | 59 | 0 | 0.40 | 0.50 | 0.41 | 0.69 | 0.40 | 0.80 | 0.80 | 1.00 | 0.80 | 0.60 | 1.00 | 0.50 |
| 4 | 60 | 0 | 0.30 | 0.50 | 0.41 | 0.69 | 0.30 | 0.60 | 0.60 | 0.60 | 0.60 | 0.80 | 0.60 | 0.50 |
| 4 | 61 | 1 | 0.30 | 0.95 | 0.41 | 0.69 | 0.30 | 0.80 | 0.80 | 1.00 | 0.60 | 0.60 | 0.80 | 0.95 |
| 4 | 62 | 1 | 0.25 | 0.95 | 0.41 | 0.69 | 0.25 | 0.80 | 1.00 | 1.00 | 0.80 | 1.00 | 1.00 | 0.95 |
| 4 | 63 | 0 | 0.35 | 0.85 | 0.41 | 0.69 | 0.35 | 0.80 | 1.00 | 1.00 | 0.80 | 1.00 | 1.00 | 0.85 |
| 4 | 64 | 0 | 0.35 | 0.65 | 0.41 | 0.69 | 0.35 | 0.80 | 1.00 | 0.80 | 0.80 | 1.00 | 1.00 | 0.65 |
| 4 | 65 | 0 | 0.25 | 0.50 | 0.41 | 0.69 | 0.25 | 0.40 | 0.80 | 0.80 | 0.80 | 0.80 | 0.80 | 0.50 |
| 4 | 66 | 0 | 0.35 | 1.00 | 0.41 | 0.69 | 0.35 | 0.80 | 1.00 | 1.00 | 0.80 | 1.00 | 1.00 | 1.00 |
| 4 | 67 | 1 | 0.40 | 0.60 | 0.41 | 0.69 | 0.40 | 0.80 | 0.60 | 1.00 | 0.80 | 0.80 | 0.60 | 0.60 |
| 4 | 68 | 1 | 0.35 | 1.00 | 0.41 | 0.69 | 0.35 | 1.00 | 1.00 | 1.00 | 0.80 | 1.00 | 1.00 | 1.00 |

|   |    |   |      |      |      |      |      |      |      |      |      |      |      |      |
|---|----|---|------|------|------|------|------|------|------|------|------|------|------|------|
| 4 | 69 | 0 | 0.45 | 0.60 | 0.41 | 0.69 | 0.45 | 0.60 | 1.00 | 1.00 | 0.80 | 1.00 | 1.00 | 0.60 |
| 4 | 70 | 1 | 0.50 | 0.55 | 0.41 | 0.69 | 0.50 | 0.60 | 0.60 | 0.60 | 0.60 | 0.60 | 0.80 | 0.55 |
| 4 | 71 | 1 | 0.30 | 0.25 | 0.41 | 0.69 | 0.30 | 0.80 | 1.00 | 0.80 | 1.00 | 1.00 | 1.00 | 0.25 |
| 4 | 72 | 1 | 0.55 | 0.95 | 0.41 | 0.69 | 0.55 | 0.80 | 1.00 | 1.00 | 0.80 | 1.00 | 1.00 | 0.95 |
| 4 | 73 | 0 | 0.35 | 0.90 | 0.41 | 0.69 | 0.35 | 0.60 | 1.00 | 1.00 | 0.80 | 1.00 | 1.00 | 0.90 |
| 4 | 74 | 1 | 0.40 | 0.85 | 0.41 | 0.69 | 0.40 | 0.80 | 1.00 | 1.00 | 0.80 | 1.00 | 1.00 | 0.85 |
| 4 | 75 | 1 | 0.55 | 0.65 | 0.41 | 0.69 | 0.55 | 0.60 | 1.00 | 1.00 | 0.80 | 1.00 | 1.00 | 0.65 |
| 4 | 76 | 1 | 0.30 | 0.85 | 0.41 | 0.69 | 0.30 | 0.80 | 1.00 | 1.00 | 0.80 | 1.00 | 0.80 | 0.85 |
| 4 | 77 | 0 | 0.95 | 0.95 | 0.41 | 0.69 | 0.95 | 0.80 | 1.00 | 1.00 | 0.80 | 1.00 | 1.00 | 0.95 |
| 4 | 78 | 1 | 0.25 | 0.50 | 0.41 | 0.69 | 0.25 | 0.60 | 0.80 | 0.60 | 0.80 | 0.60 | 1.00 | 0.50 |
| 4 | 79 | 0 | 0.30 | 0.65 | 0.41 | 0.69 | 0.30 | 0.60 | 0.60 | 0.80 | 0.80 | 0.60 | 0.80 | 0.65 |
| 4 | 80 | 0 | 0.50 | 0.50 | 0.41 | 0.69 | 0.50 | 0.60 | 1.00 | 0.60 | 0.80 | 0.60 | 1.00 | 0.50 |
| 4 | 81 | 1 | 0.40 | 0.50 | 0.41 | 0.69 | 0.40 | 0.60 | 1.00 | 1.00 | 0.80 | 1.00 | 1.00 | 0.50 |
| 4 | 82 | 0 | 0.55 | 0.65 | 0.41 | 0.69 | 0.55 | 0.60 | 0.80 | 1.00 | 0.80 | 0.60 | 1.00 | 0.65 |
| 4 | 83 | 0 | 0.30 | 0.95 | 0.41 | 0.69 | 0.30 | 0.60 | 1.00 | 0.60 | 0.60 | 1.00 | 1.00 | 0.95 |
| 4 | 84 | 0 | 0.35 | 0.65 | 0.41 | 0.69 | 0.35 | 0.60 | 1.00 | 1.00 | 0.80 | 1.00 | 1.00 | 0.65 |
| 4 | 85 | 0 | 0.40 | 0.65 | 0.41 | 0.69 | 0.40 | 0.60 | 0.80 | 0.80 | 0.80 | 0.80 | 0.80 | 0.65 |
| 4 | 86 | 1 | 0.25 | 0.50 | 0.41 | 0.69 | 0.25 | 0.60 | 0.60 | 1.00 | 0.60 | 0.80 | 1.00 | 0.50 |
| 4 | 87 | 1 | 0.20 | 1.00 | 0.41 | 0.69 | 0.20 | 0.60 | 1.00 | 1.00 | 0.60 | 1.00 | 1.00 | 1.00 |
| 4 | 88 | 1 | 0.35 | 0.60 | 0.41 | 0.69 | 0.35 | 0.60 | 0.60 | 1.00 | 0.80 | 1.00 | 0.80 | 0.60 |
| 5 | 1  | 0 | 0.30 | 0.40 | 0.38 | 0.60 | 0.30 | 0.80 | 1.00 | 1.00 | 0.80 | 0.80 | 1.00 | 0.40 |
| 5 | 2  | 0 | 0.40 | 0.75 | 0.38 | 0.60 | 0.40 | 0.80 | 1.00 | 1.00 | 0.80 | 0.80 | 1.00 | 0.75 |
| 5 | 3  | 0 | 0.55 | 0.60 | 0.38 | 0.60 | 0.55 | 0.60 | 1.00 | 1.00 | 0.80 | 0.80 | 0.80 | 0.60 |
| 5 | 4  | 0 | 0.50 | 0.50 | 0.38 | 0.60 | 0.50 | 0.80 | 0.80 | 0.80 | 0.80 | 0.80 | 1.00 | 0.50 |
| 5 | 5  | 1 | 0.30 | 0.65 | 0.38 | 0.60 | 0.30 | 0.60 | 1.00 | 1.00 | 0.80 | 0.80 | 1.00 | 0.65 |
| 5 | 6  | 1 | 0.40 | 0.60 | 0.38 | 0.60 | 0.40 | 0.60 | 0.80 | 1.00 | 0.80 | 0.60 | 1.00 | 0.60 |
| 5 | 7  | 1 | 0.30 | 0.75 | 0.38 | 0.60 | 0.30 | 0.60 | 1.00 | 0.80 | 0.80 | 0.80 | 1.00 | 0.75 |
| 5 | 8  | 0 | 0.30 | 0.55 | 0.38 | 0.60 | 0.30 | 0.80 | 0.80 | 0.60 | 0.80 | 0.80 | 1.00 | 0.55 |
